# Supplementary material for: Apigenin inhibits NF-κB and Snail signaling, EMT and metastasis in human hepatocellular carcinoma
Source: PubMed Central journal article supplement (PMC5173069; doi:10.18632/oncotarget.9404), 2016-05-17
Supplement: oncotarget-07-41421-s001.pdf [file oncotarget-07-41421-s001.pdf]

# Apigenin inhibits NF- $\kappa$ B and snail signaling, EMT and metastasis in human hepatocellular carcinoma

## Supplementary Materials

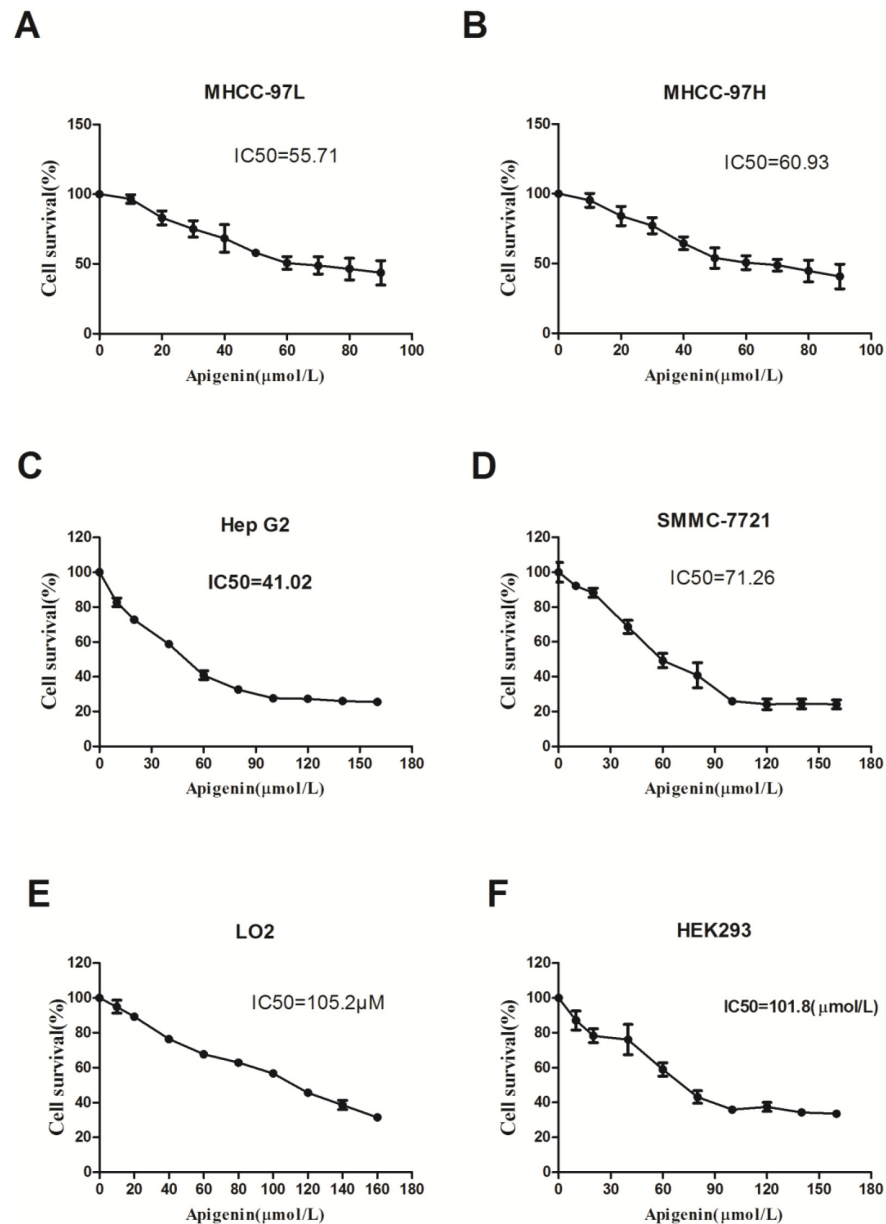

**Supplementary Figure S1: Effects of apigenin on cell viability in hepatocarcinoma cells, normal human liver cells, and normal human cells. (A–D)** Survival of different hepatocarcinoma cells treated with the indicated amounts of apigenin for 48 h. **(E)** Survival of LO2 normal human liver cells treated with the indicated amounts of apigenin for 48 h. **(F)** Survival of human embryonic kidney 293 cells treated with the indicated amounts of apigenin for 48 h.

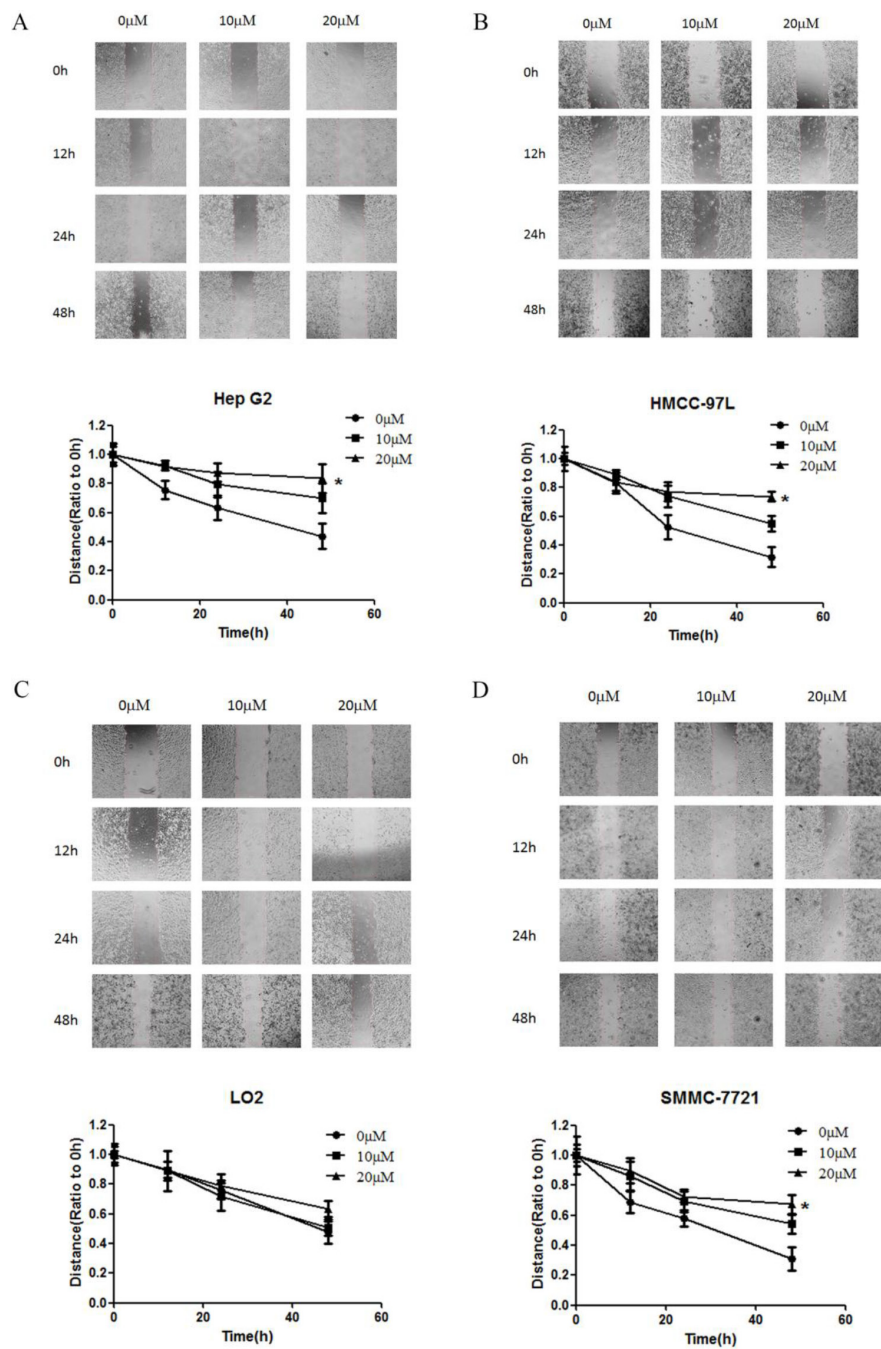

**Supplementary Figure S2: Effects of apigenin on cell migration.** (A–D) Cells were re-incubated in medium containing 0, 10, or 20  $\mu$ M apigenin for 48 h; apigenin inhibited migration.

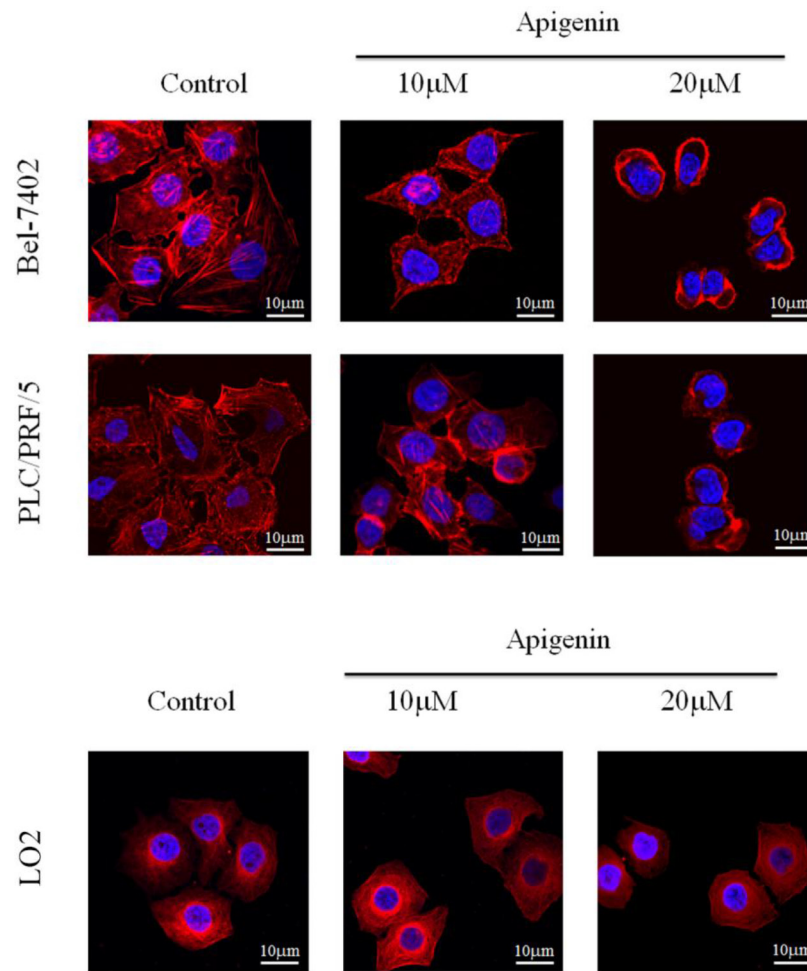

Supplementary Figure S3: Effect of apigenin on cellular microtubule morphology.

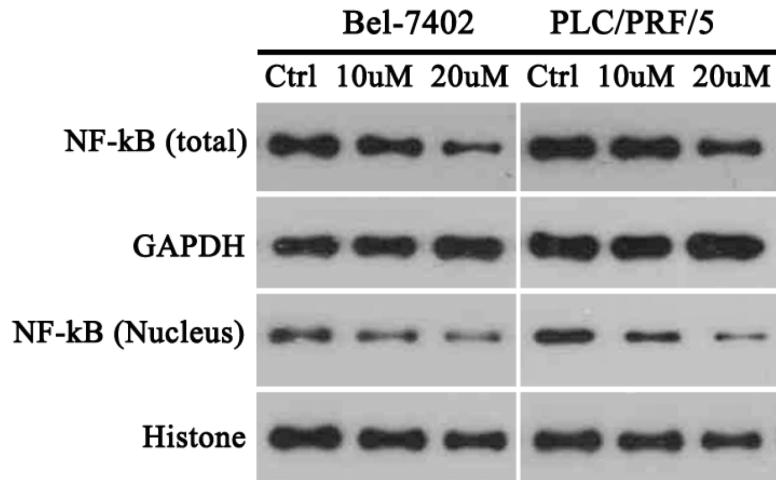

Supplementary Figure S4: Apigenin inhibits NF-κB in human liver cancer.

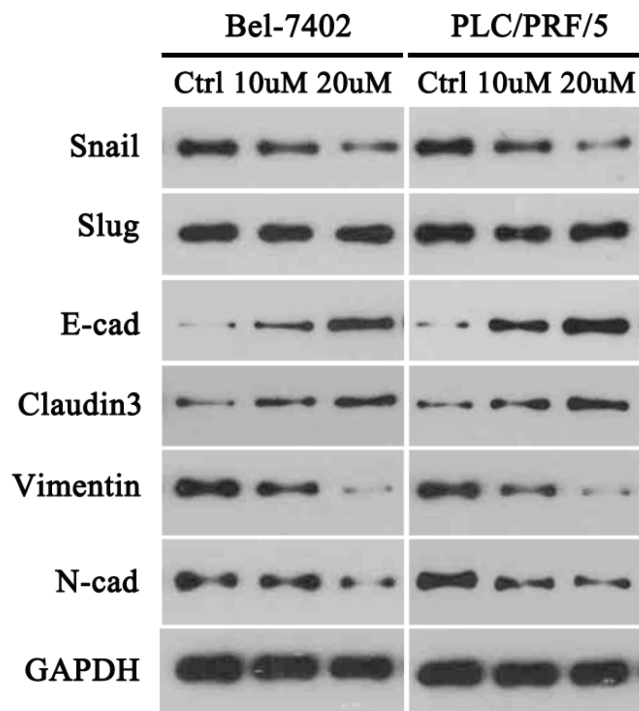

Supplementary Figure S5: Apigenin decreased Snail, Vimentin and N-cadherin levels and increased E-cadherin and Claudin3 levels; Slug levels did not change.

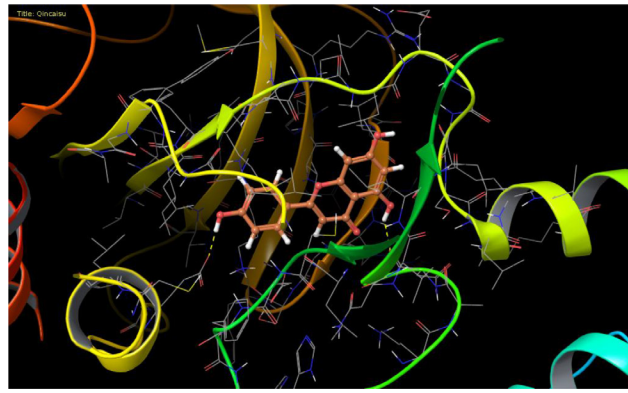

**Supplementary Figure S6: Molecular docking analysis showed that apigenin may target NF-κB-inducing kinase (NIK).**

**Supplementary Table S1: Snail and slug promoter reporter clones**

| Promoter reporter clones | Promoter sequence                                                                                                 | Vector information |
|--------------------------|-------------------------------------------------------------------------------------------------------------------|--------------------|
| Snail*                   | Promoter Length: 1255 bp<br>Sequence length upstream of TSS: 1185 bp<br>Sequence length downstream of TSS: 69 bp  | pEZX-PG04          |
| Slug*                    | Promoter Length: 1399 bp<br>Sequence length upstream of TSS: 1235 bp<br>Sequence length downstream of TSS: 163 bp |                    |

\*The promoter reporter clones were purchased from GeneCopoeia (Guangzhou, China).

**Supplementary Table S2: AP-1, STAT3, NF-κB, cMyc luciferase reporter gene vector**

| Reporter gene vector | Response element                                                                                  | Vector information |
|----------------------|---------------------------------------------------------------------------------------------------|--------------------|
| pAPI-TA-luc*         | API response element 26–67<br>TGACTAATGACTAATGACTAAT<br>GACTAATGACTAATGACTAA                      | pGL6-TA            |
| pSTAT3-TA-luc*       | STAT3 response element 32–86<br>TGCTTCCCG AACGTTGCTT<br>CCCGAACGTT GCTTCCCGAA<br>CGTTGCTTCC GAACG | pGL6-TA            |
| pNFκB-TA-luc*        | NFκB response element 26–65<br>GGGAATTTCCGGGAATTTCCGGGAATTT<br>CCGGGAATTTCC                       | pGL6-TA            |
| pcMyc-TA-luc*        | cMyc response element 26–61<br>CACGT GCACGTGCAC GTGCACGTGC<br>ACGTGCACGT                          | pGL6-TA            |
| pRL-TK#              | HSV-TK promoter 7–759                                                                             | pRL                |

\*The reporter gene vector were purchased from Beyotime Biotechnology (Shanghai, China).

#The reporter gene vector was purchased from Promega.
